# Supplementary material
Source: PubMed Central journal article supplement (PMC4279742)
Supplement: ASN.2014010113_ASN2014010113SupplementaryData.pdf [file ASN.2014010113_ASN2014010113SupplementaryData.pdf]

Supplementary Table 1

The adjusted annualized change in Living Kidney Donation (pmp per year)  
in Q2, Q3, Q4, and Q5 compared to Q1 between 1999-2004 and 2005-2010

| Income Quintiles                       | 1999-2004        | 2005-2010        |
|----------------------------------------|------------------|------------------|
| Q1 <sup>+x</sup><br>(<\$30,962)        | 0.00             | 0.00             |
| Q2 <sup>+</sup><br>(\$30,962-\$37,314) | 0.42(0.38,0.48)* | 0.03(-0.17,0.15) |
| Q3 <sup>+</sup><br>(\$37,315-\$44,723) | 0.43(0.39,0.45)* | 0.06(-0.18,0.24) |
| Q4 <sup>+</sup><br>(\$44,724-\$56,580) | 0.80(0.79,0.82)* | 0.25(0.14,0.38)* |
| Q5 <sup>+</sup><br>(>\$56,580)         | 1.18(1.16,1.20)* | 0.60(0.56,0.65)* |

Multilevel linear regression model adjusted for donor age, gender, and race, population age, gender, and race, ESRD rate standardized for age and gender, and RUCA, clustered by state of residence;

<sup>x</sup>Adjusted annualized change in donation assigned at 0.00 donors pmp per year for Q1 (reference group)

\*denotes a p value<0.05

<sup>+</sup>donor income categories based on 2000 US Census data

Supplementary Table 2

The adjusted annualized change in LRD, LURD, and Spousal donation (pmp per year)  
in Q2, Q3, Q4, and Q5 compared to Q1 between 1999-2004 and 2005-2010

| INCOME<br>QUINTILES                          | LRD<br>(Living related donation) |                  | LURD<br>(Living unrelated donation) |                   | Spousal Donation |                  |
|----------------------------------------------|----------------------------------|------------------|-------------------------------------|-------------------|------------------|------------------|
|                                              | 1999-2004                        | 2005-2010        | 1999-2004                           | 2005-2010         | 1999-2004        | 2005-2010        |
| <b>Q1<sup>+</sup></b><br>(<\$30,962)         | 0.00                             | 0.00             | 0.00                                | 0.00              | 0.00             | 0.00             |
| <b>Q2<sup>+</sup></b><br>(\$30,962-\$37,314) | 0.21(-0.09,0.76)                 | 0.23(-0.31,0.66) | 0.08(-0.21,0.16)                    | 0.30(-0.20,0.80)  | 0.02(-0.32,0.47) | 0.11(-0.16,0.34) |
| <b>Q3<sup>+</sup></b><br>(\$37,315-\$44,723) | 0.19(-0.19,0.65)                 | 0.02(-0.36,0.42) | 0.09(-0.20,0.26)                    | 0.50 (-0.21,1.29) | 0.03(-0.36,0.41) | 0.15(-0.13,0.44) |
| <b>Q4<sup>+</sup></b><br>(\$44,724-\$56,580) | 0.41(-0.03,0.82)                 | 0.27(-0.31,0.67) | 0.63(-1.28,2.28)                    | 0.50 (-0.08,1.07) | 0.01(-0.31,0.64) | 0.29(0.02,0.55)* |
| <b>Q5<sup>+</sup></b><br>(>\$56,580)         | 0.62(0.20,1.06)*                 | 0.47(-0.13,0.74) | 1.67(0.00,3.99)*                    | 0.72 (0.09,1.35)* | 0.21(-0.13,0.67) | 0.71(0.05,1.27)* |

Multilevel linear regression model adjusted for donor age, gender, and race, population age, gender, and race, ESRD rate standardized for age and gender, and RUCA, clustered by state of residence;

<sup>x</sup>Adjusted annualized change in donation assigned at 0.00 donors pmp per year for Q1 (reference group)

\*denotes a p value<0.05

<sup>+</sup>donor income categories based on 2000 US Census data
